# Supplementary material
Source: Springer Nature journal article supplement (https://www.springermedizin.de/resource/supplementary/12947_2010_348_MOESM3_ESM.pdf/9556784)

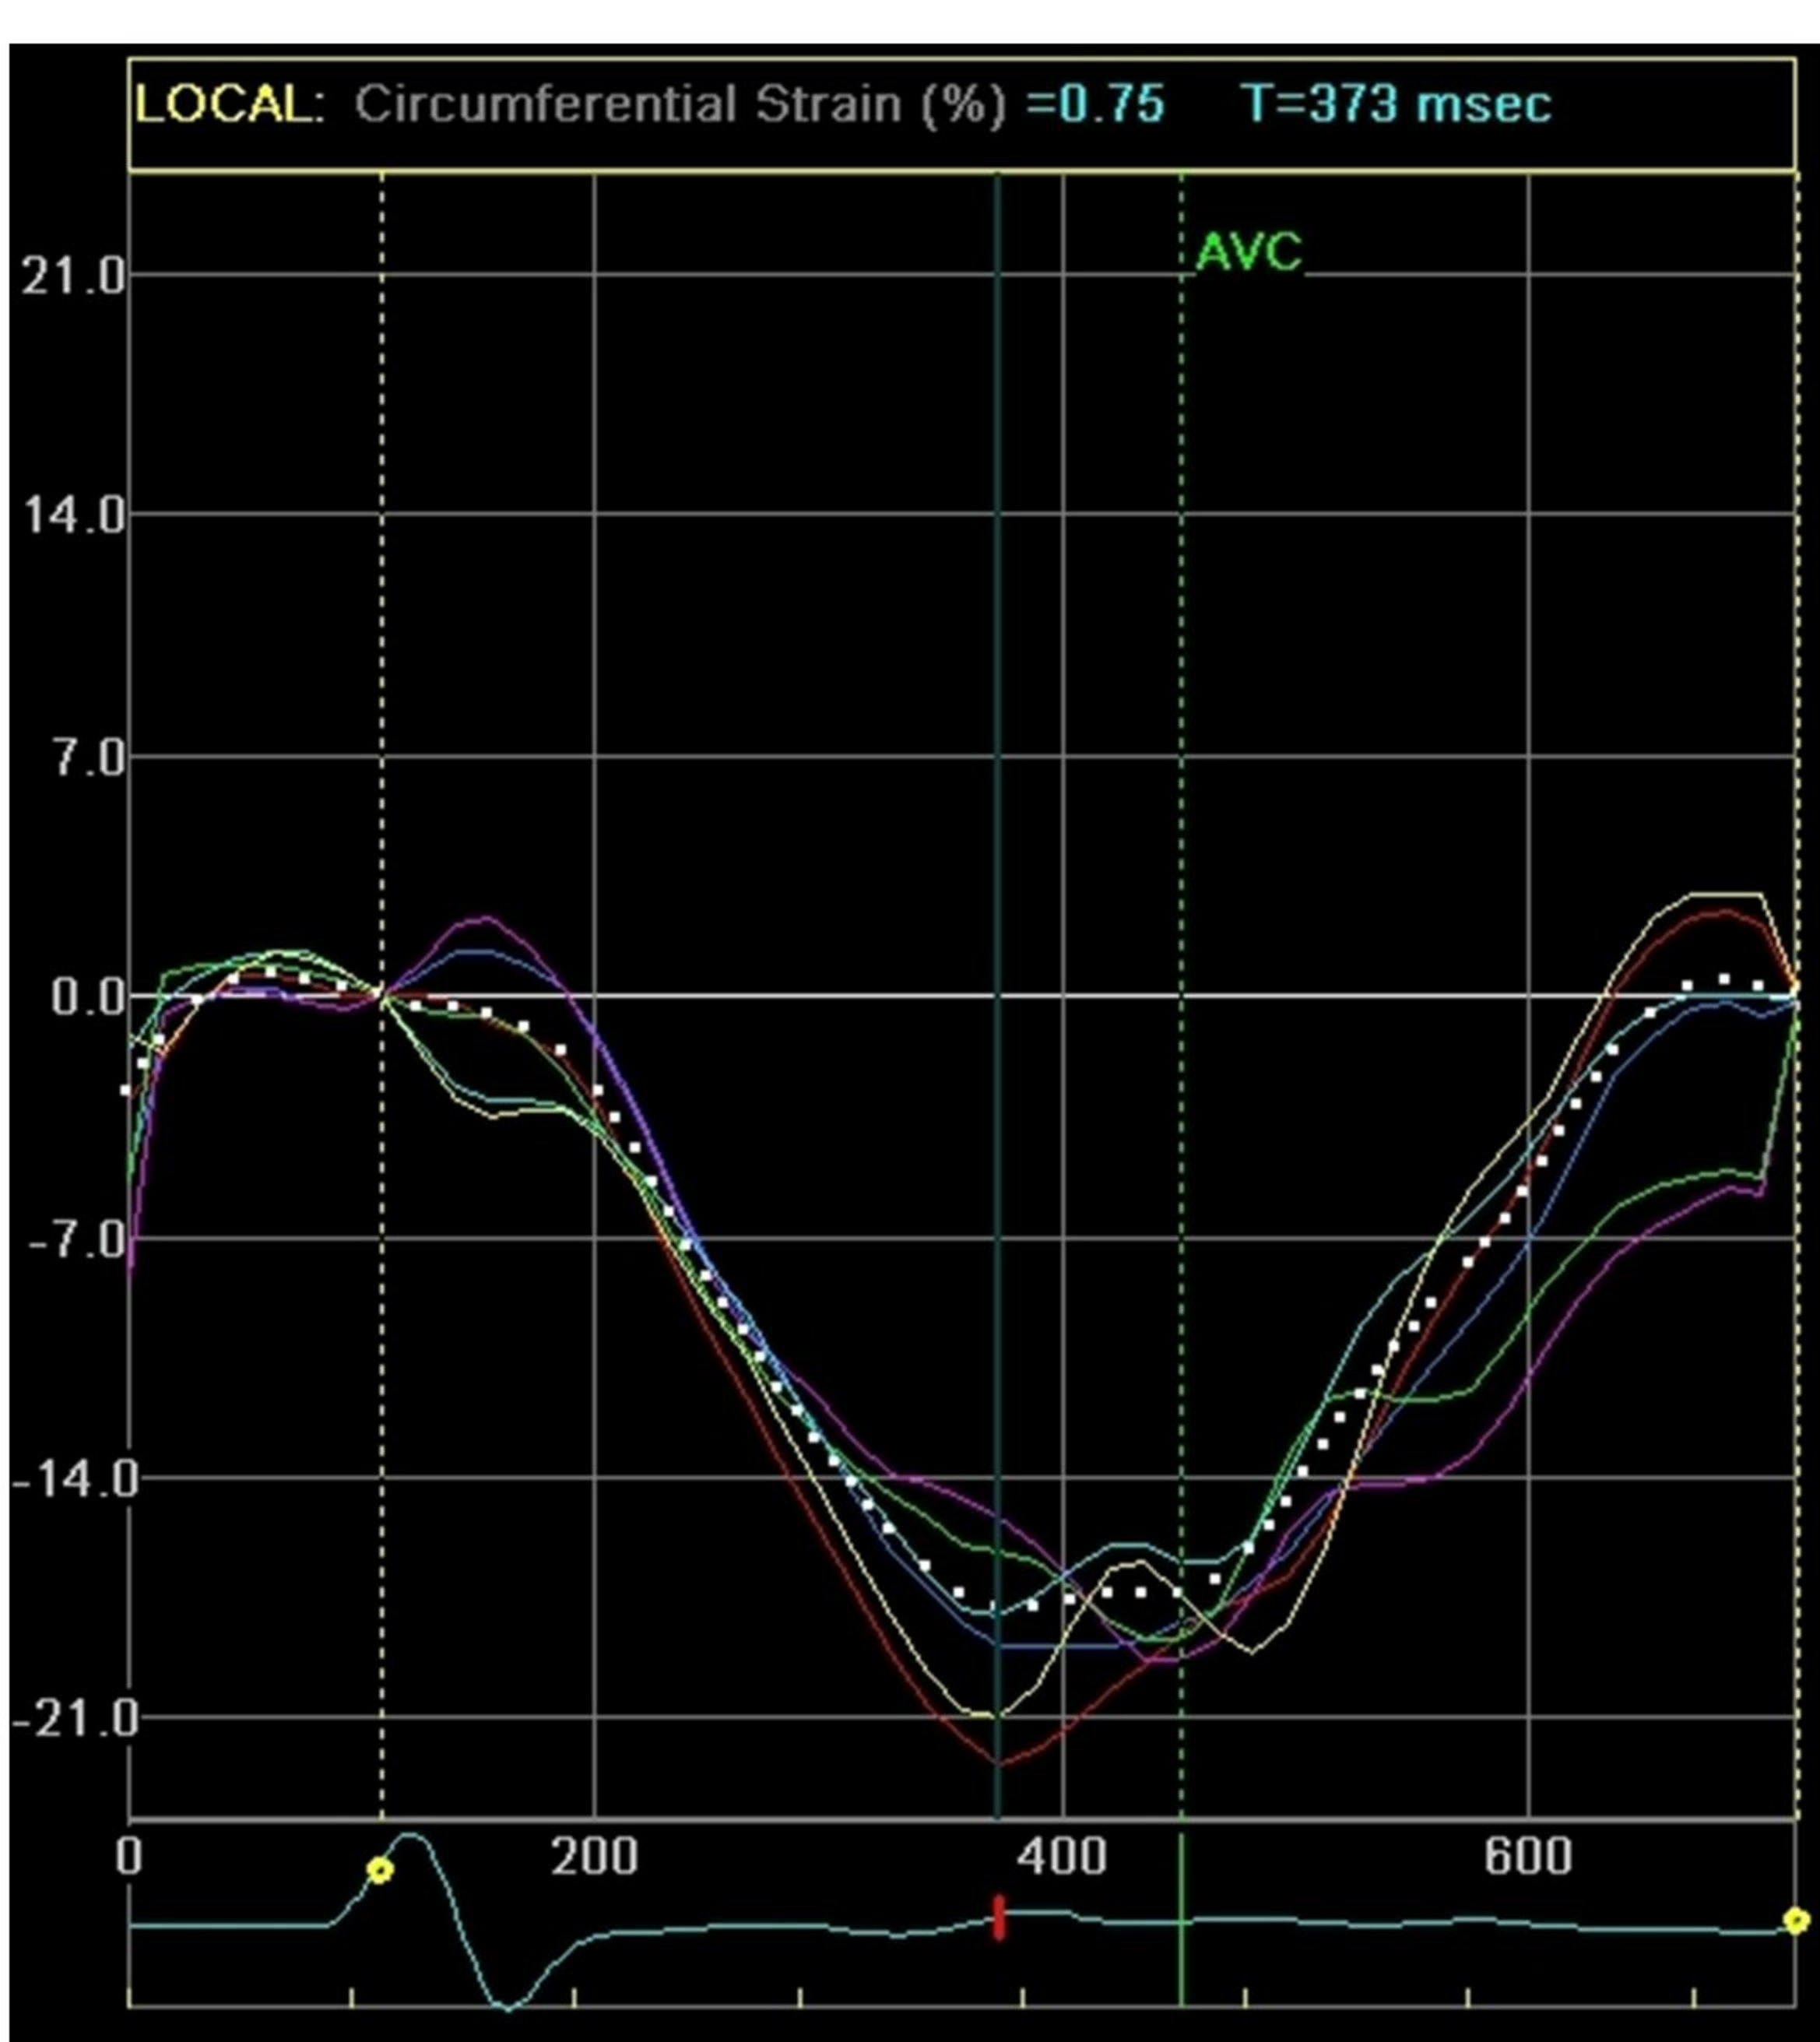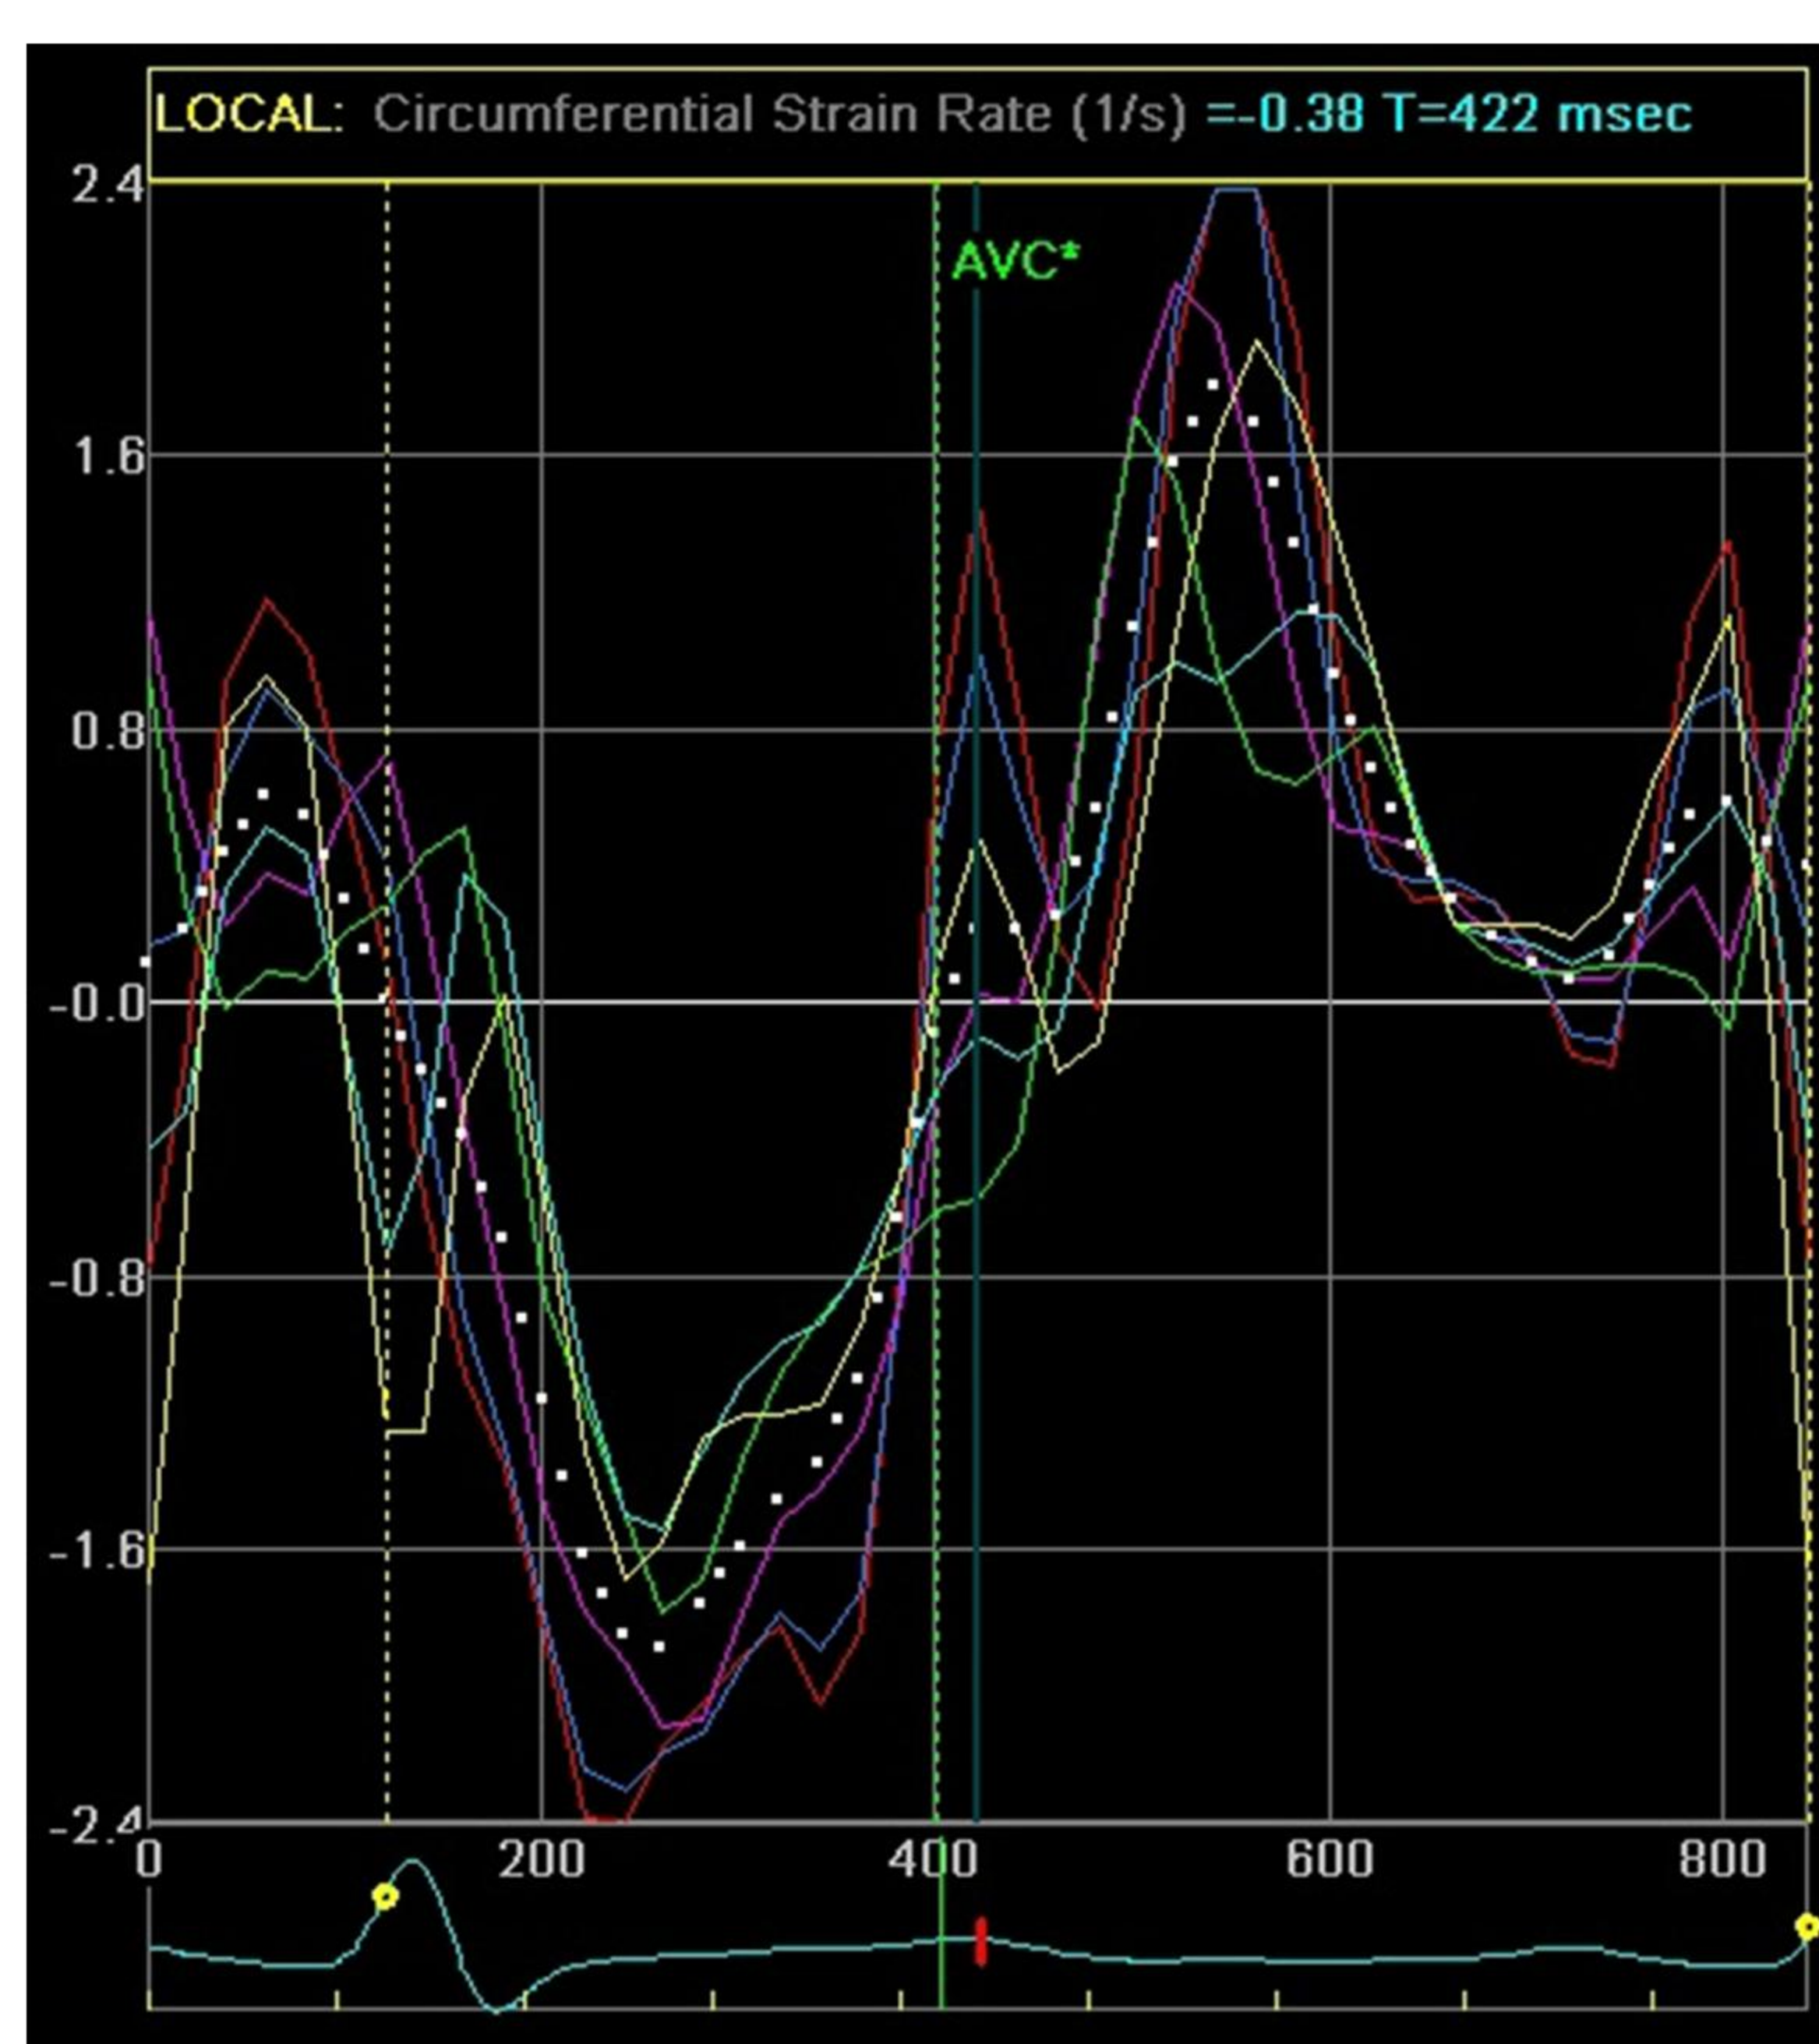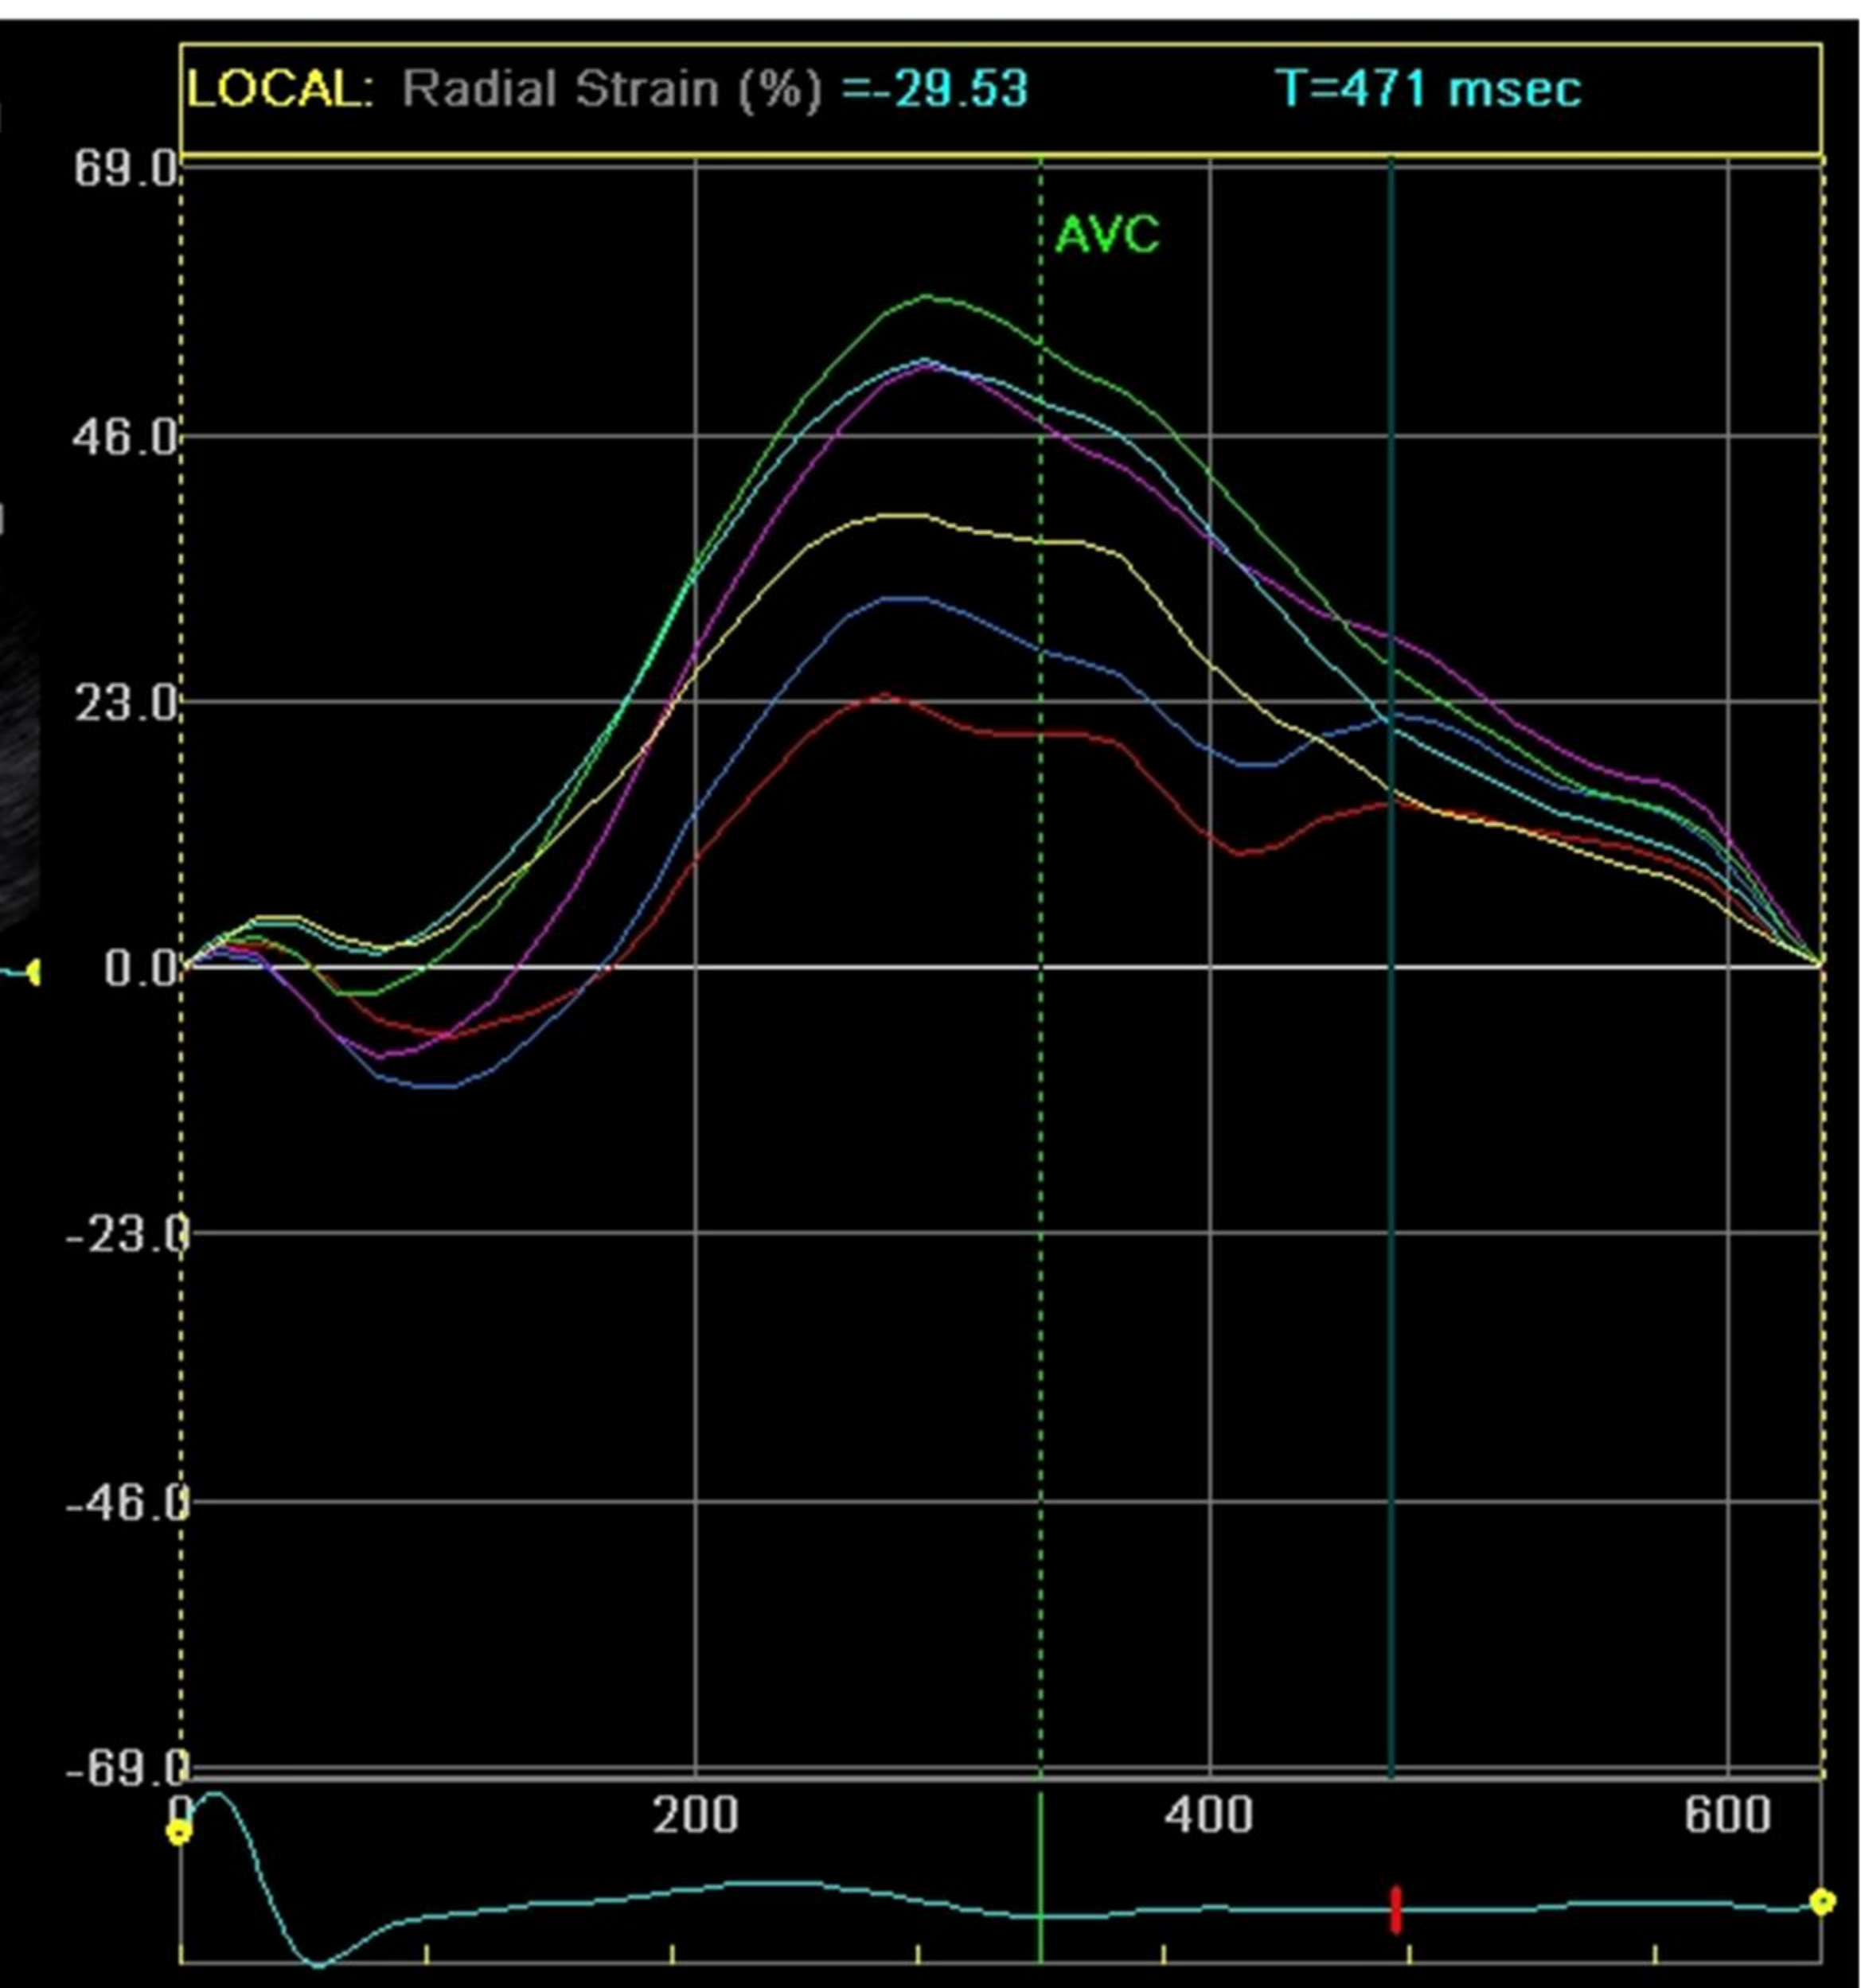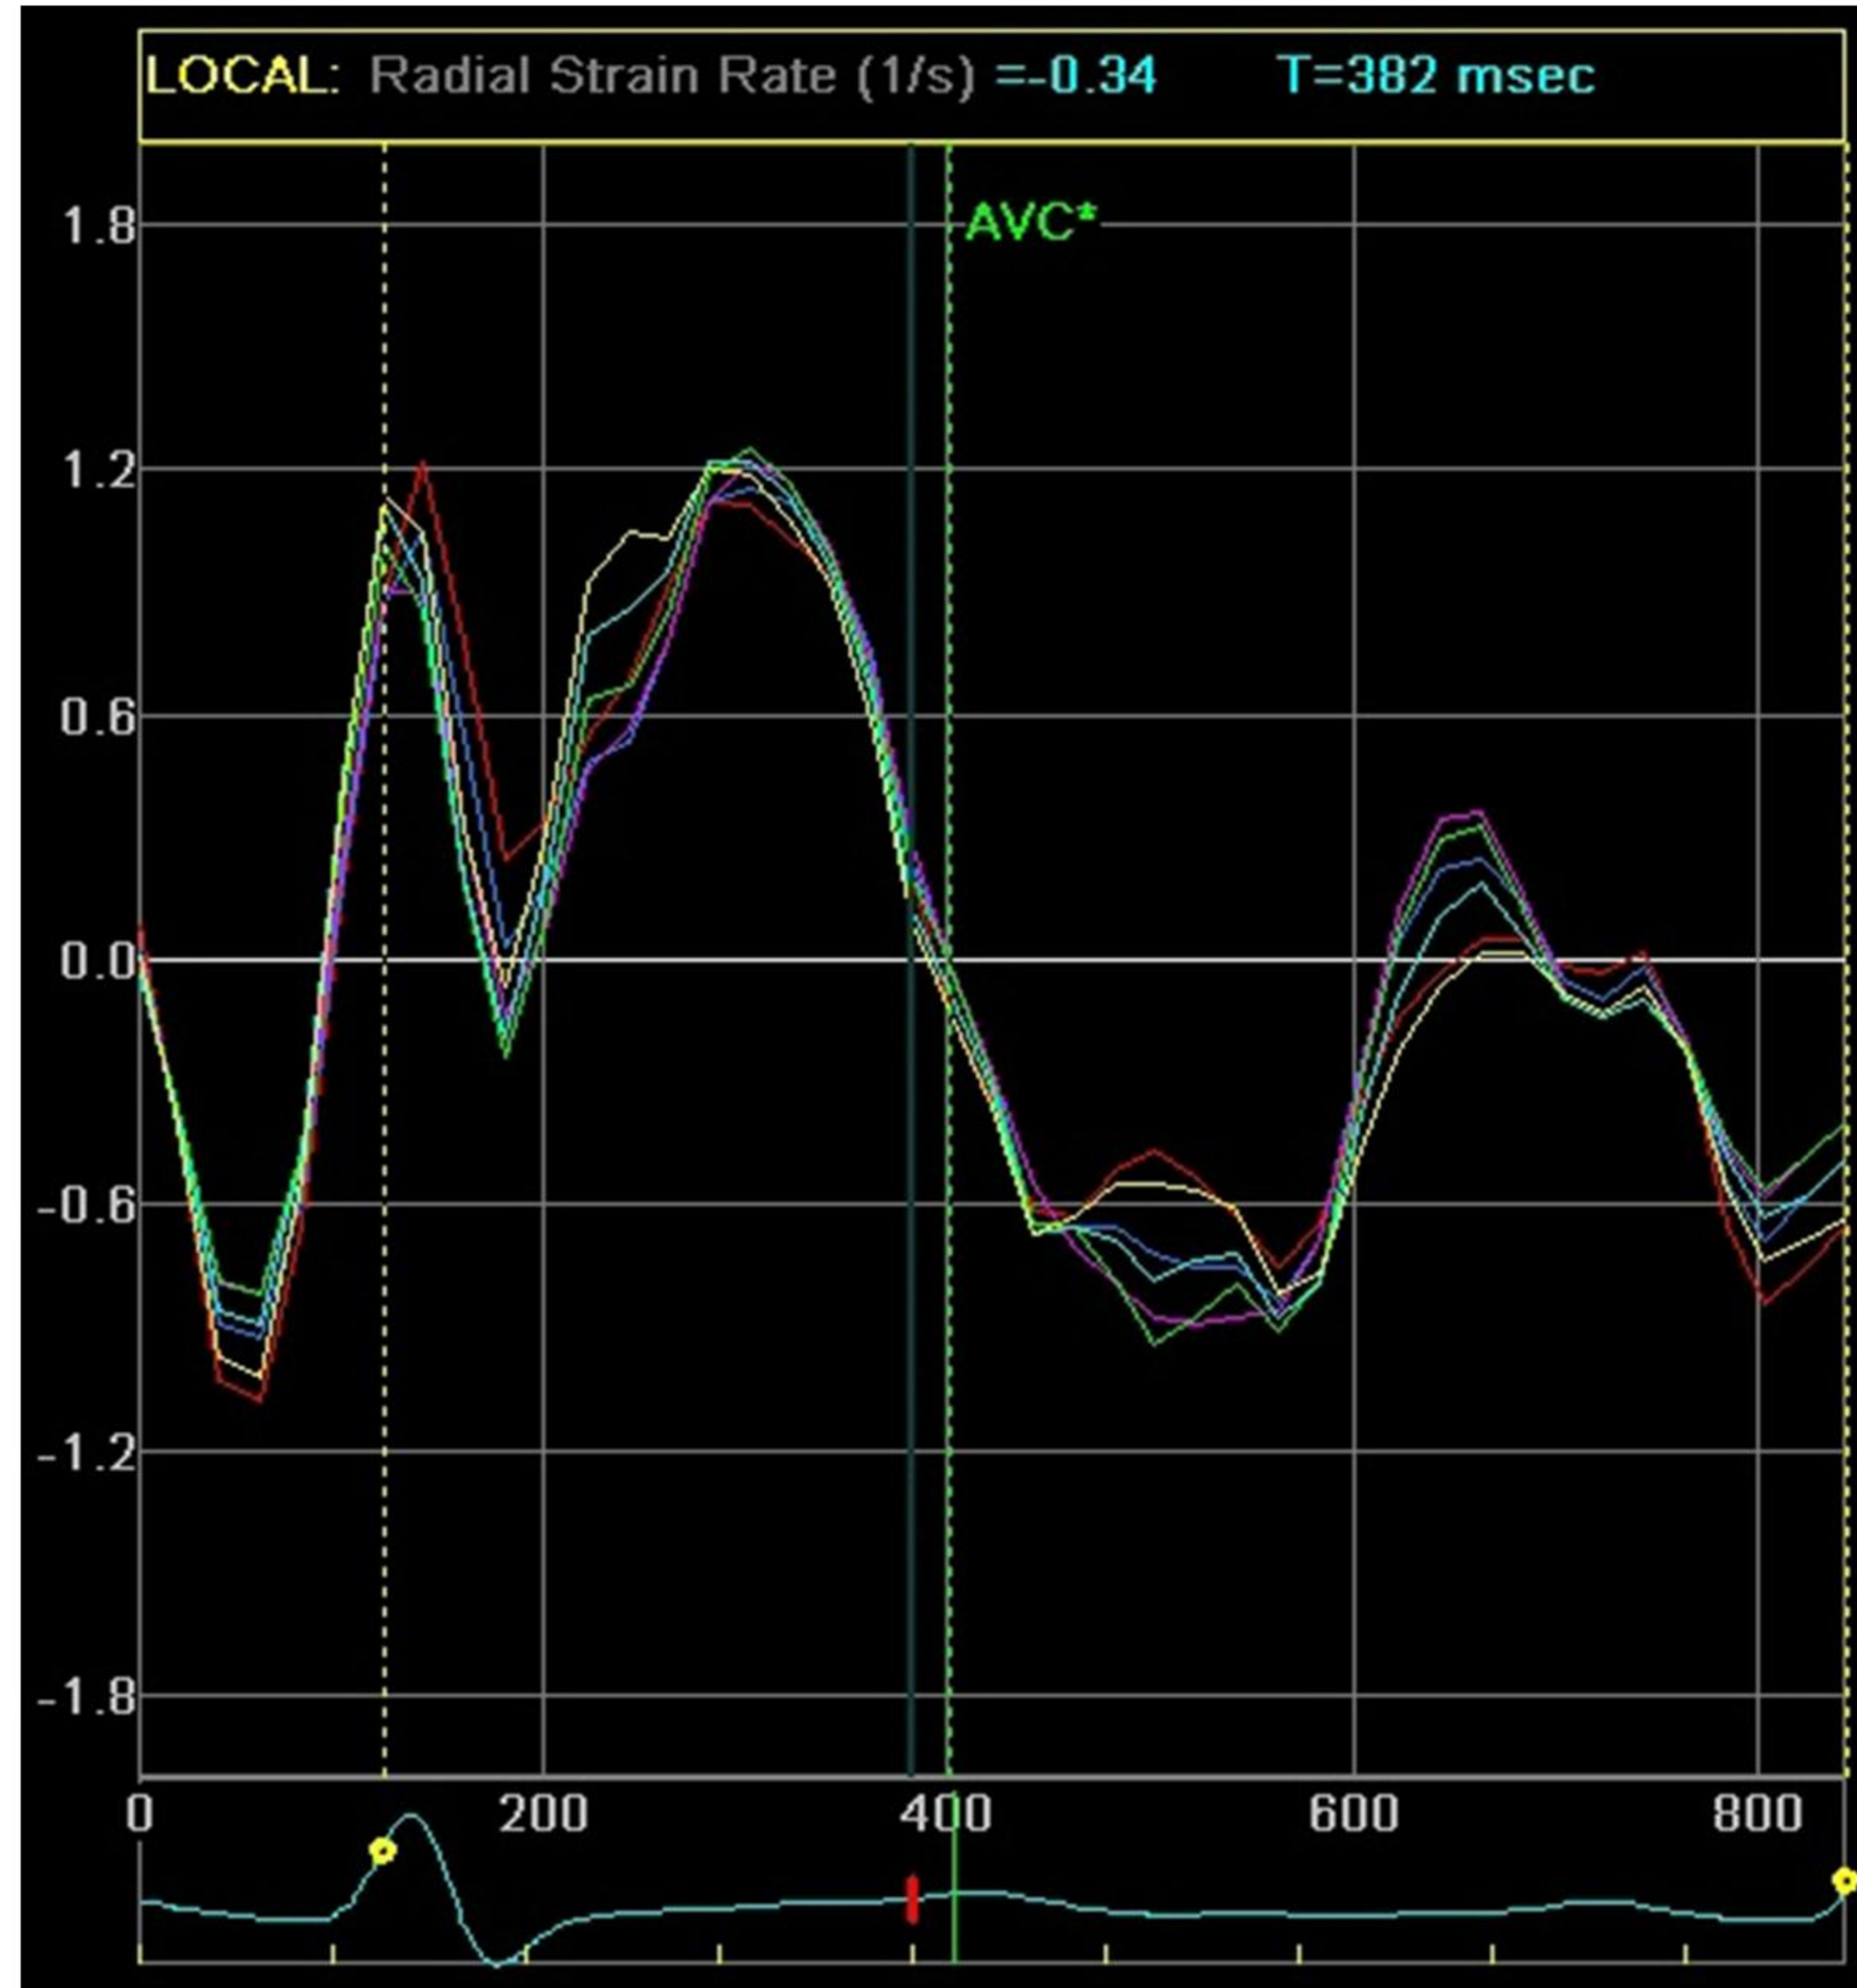

Supplement: MOESM3 [file 9556784]
